# Supplementary material for: A review on nanostructured silver as a basic ingredient in medicine: physicochemical parameters and characterization
Source: Beilstein J Nanotechnol. 2021 May 14;12:440–61. doi: 10.3762/bjnano.12.36 (PMC8144915; doi:10.3762/bjnano.12.36)
Supplement: File 2 — Conversion from mass concentration (ppm) to particle concentration of AgNPs with different shapes. [file Beilstein_J_Nanotechnol-12-440-s002.xlsx]

## Sheet: Nanoparticles_Concentration
	Nanoparticle	Silver
	Shape	Nanospheres
	Mass concentration	20		mg/L
	Nanoparticle Data						Particles	Density
	Diameter sphere			10	nm		Silver	10.49
	unused field for calculation >>>>>>>>>			1	nm
	Density			10.49	g/cm3
	Volume			5.23599e-19	cm3
	Particle mass			5.49255e-18	g
	Concentration mass (g/mL)			2e-05	g/mL
	Concentration mass (mg/mL)			0.02	mg/mL
	Number of particles/mL			3.6413e+12	<<<<<<<<<<<<<<<<
	Particle Molarity (nM/L) (nanoMolar)			6.04651	nM/L
	Particle Molarity (nM/mL) (nanoMolar)			0.00604651	nM/mL
	Particle Molarity (pM/L) (picoMolar)			6046.51	pM/L
	Particle Molarity (pM/mL) (picoMolar)			6.04651	pM/mL
							Shape	Formula			Volume	Particle mass	Vol x Dens
							Nanospheres	V=4/3pr3	Diameter sphere		5.23599e-19	5.49255e-18	5.49255e-18
							Nanocube	V=L3	Length of the side		1e-18	1.049e-17	1.049e-17
							Triangular nanoplate	V=((L2√3)/4)h	Length of the side	Thickness	4.33013e-20	4.5423e-19	4.5423e-19
							Hexagonal nanoplate	V=((3L2√3)/2)h	Length of the side	Thickness	2.59808e-19	2.72538e-18	2.72538e-18
							Nanorods	V=(pr2)h	Diameter circular area	Length	7.85398e-13	8.23883e-12	8.23883e-12
